# Supplementary material
Source: PubMed Central journal article supplement (PMC4862005)
Supplement: NIHMS760986-supplement-Supplementary_Information.pdf [file NIHMS760986-supplement-Supplementary_Information.pdf]

## Supplementary Tutorial How to synthesize a deletion allele and make a knockout strain

This tutorial is aimed at the novice geneticist and provides anticipated outcomes for key steps of the genome engineering protocol. Here we provide an example of how to design primers and build an in-frame deletion allele. To do this, we focus on creating a deletion in the *Pseudomonas aeruginosa pelF* gene, which encodes a cytosolic glycosyltransferase essential for the biosynthesis of the extracellular polysaccharide PEL<sup>1</sup>. We subsequently use this deletion allele, as well as other deletion alleles, to illustrate the capacity of the non-mucoid *P. aeruginosa* PAO1 strain to produce two different biofilm structural extracellular polysaccharides, PEL and PSL<sup>2</sup>.

### Primer design (Steps 1-3)

We retrieved the information for *pelF* from the Pseudomonas Genome Database<sup>3</sup>. Using the guidelines presented in this protocol, we designed primers to delete an in-frame, 1473 bp fragment of coding sequence from the 1524 bp *pelF* ORF (illustrated in Supplementary Fig. 2A). In the example below, the desired T<sub>m</sub> of the primers was 60 ± 2 °C. The target sequences in the genome are underlined, regions of reverse complementarity are *italicized*, and the targets of sequencing primers are highlighted in **yellow**:

Upstream sequence (500 bp):

```
GCCCTGCGCGACCCCGCCGACGACGTCCGCCTGTGGCCTACTCGATGCTCGACCAGAAGGAAAGCCGGATCAACCAGCGCATCGAGGCCCCCTCGGCC  
GCCTCGCCGGCGCCACGCGCGCGACGCGGGCGCGCTGCACGGAACCCCTGGCGCGCTGGTACTGGGAACCTGGCCCTACCTGGGGTTGGCCAGGGCAGCGT  
GCTGGAGCACATCCTCGAGCAGGCGCGGACGATACCGACCGCGCTGCGCGGCACACCCCTCGGCCGACCTGCATCTGCTGGCCGGCGCATCGCCCTC  
GAACAAGGCCCGCTGGAGGATCCGGACGCGCCCTCCAGGCCCGGAGGAGCGGGAATCGATAGTGCAGCTGGCGCCGTTCCGCGCCGAGGTGGCGT  
TCTTCCAGCGCGCTACCGGGACATCCCCGGCTTCTCGCCGGAATGCCGACGACATGCTGCAACGGCCGCCCTTCGCGGCCCTGGCGAGATACTGGAC
```

*pelF* ORF:

```
ATGACCGAACACACCCGCTCCGACGGCGCCGCTCGCCGATGTCTGCCTGCTGCTGGAGGGCACCTGGCCCTATGTCGCGGGCGCGCTCTCCAGCTGGGTCA  
ACCAATTGATCCTCGGTCTCCCGACCTGACCTTCTCGGTGTTCTTCCATCGCGCGCCAGAAAGGATGCCTACGGCAAGCGCCACTACCCGATCCCGGACAA  
TGTGCTGCACATCGAGGAACACTTCTGGAAACCGCCTGGAGTTCGCCGAACCCGACGACGCGACAGGGCAGTAGCGAGACCGAAAAGCGTTGCGCGAT  
CTGCACCGTTTCTTCCACTACCCGGAGACGCCGACGTGGAGGAGGGCGACGCGCTGCTCGACCTGCTCGCCGAGGGCCGCATCGCCCGGAGGACTTTC  
TCCACAGCAAGGCCAGTTGGGAGGGGATCACCGCAGGCTACGAGCGCTATTGCACCGATCCGTCCTTCCGCAATTACTTCTGGACCTGCGCTCGATGCA  
GGCGCCGGTGTTCATGCTCGCCGAGGCGGCCCGCGGATGCCGCGCGCGCATGCTGCACCTCGATCTCCACCGGCTACGCGCGCCTGCTGGGCTGCATC  
CTGCAACGTCGCTGGGGTCCGCTACCTGCTCAGCGAGCACGGCATCTACACCAAGGAGCGCAAGATCGACCTGGCCAGGCCAACTGGATCGCGGAGA  
ACCCCGACGAGCAGCTGAGTACCGGACTGGATGCCGAGGTCAGTACATCCGTCGTTGTGGATCCGCTTCTTCGAGCGTGTCCGGCTGCTCACCTATCG  
CGCCGCAATCCGATCGTCGCCCTCTACGAAGGCAACCGCCAGCGCCAGGTACTCGATGGCGCCGAGCCAGCGGCACCCGGGTGATCCCCAAGGCGATC  
GACCTCGATGCTGGACCGGCCCTCGAACGGCGGCCCGGGGATTCGCCGGTGGTGGGCTGGTCCGCCGGGTAGTGCAGTCAAGGACGTGAAGA  
CCTTTCATCCGCGCCATGCGCGGGTGGTACGCGGATGCCGAGGCGGAGGGCTGGATCGTCCGTCGGAGGAGGAAGATCCGGACTATGCCAGCGAATG  
CCGACGCTGGTGGCCAGCCTCGCCCTGCAGGACAAGGTGAAGTTCCTCGGTTTCCGTCGGATCCGCGAGGTCCTGCCGCAACTCGCCCTGATGGTCCCTC  
ACCTCGATCAGCGAAGCGCAGCCGCTGGTGATCCTCGAAGCCTGGGCTGCCGGCCCGCCGGTGGTGGAGCAGCGACGTCGGCTCCTGCCGCAACTGATCG  
AAGGCGCGACGCGAAGATCGCCCTGGGTCGCGCGGGGAGGTGGTGGCGATCGCCGACCCGAGGCCACTTCGCGGGCGATCCTCGCCCTGCTGCG  
CAATCCGACGCTGGCAGGCGGCCAGGCGGTCCGCTGCAACGGGTGCAACGCTACTACACCGAGGCGCTGATGCTCGGACGTTACCGCGGGCTGTATC  
CGCGAAGCCACGGAGATTGCATGA
```

Downstream sequence (500 bp):

```
CATGGCCGCATCGGCTTCGAACTGCGGAAGATCCTTCCCGCATTCCTATACGGCGACCCCTGCGCGCTACCTCTACGCCGGGTGATCAGCTCCGGT  
CCCTGGGTGCTGTCGATCGTACGCTGATGCTGATCGCGGTGCTGAGCCCTCGCGGTGGTGGTCCGGACGTCGTTGGTCCGGCAGTTCTGATCAGCGTGA  
CCTACTGATGGCGCTGTCGCTGATCTTACCGGGGACTGCAACTGTTCTTCCCGCTTCAATTCGATCGCTGTTTCGAGCGCAAGCACGAGGCGAT  
CCTGCCAACTTGGTGGCGTGTGCTGGTGACGTTGGCGGGCGCCGCTGCTCGGCCGATATTGCTGGCGACCCTGTTTCGATGAGCCGTTCCGCTAC  
CGCTGCTGGTATGGCAACTTCGTTGGTCTGCAACCTGTGGTGGTATCATCTTCTGTCGGGAATGAAGGCCATAAAGCATCCTGCTGGTGA
```

The primers were synthesized as follows (note that *attB1* and *attB2* sequences for Gateway® recombination are shaded, see Box 2 for design guidelines):

pelFupF01-GWB1 (Primer "Up-F")

GGG GAC AAG TTT GTA CAA AAA AGC AGG CTA CGC TGG TAC TGG GAA CTG GC

pelFupR01 (Primer "Up-R")

GCA ATC TCC GTG GCT TCG CGG TAC AGC GGA GCG GTG TGT TCG GTC

pelFdownF01 (Primer "Down-F")

CTG TAC CGC GAA GCC ACG G

pelFdownR01-GWB2 (Primer "Down-R")

GGG GAC CAC TTT GTA CAA GAA AGC TGG GTA CAG GGT CGC CAG CAA TAT CG

pelFF01-SEQ (Primer "Seq-F")

CTA CTC GAT GCT CGA CCA GAA G

pelFR01-SEQ (Primer "Seq-R")

GAT GCG TTT GTA GGC CTT CAT TC

### PCR to synthesize the mutant allele (Steps 4-12)

Primer melting temperature ( $T_m$ ) calculated with Oligocalc<sup>4</sup> or Primer3<sup>5</sup> are usually accurate; however, these  $T_m$  values do not always correspond to those that give the best amplification *in vitro*. Here, temperature-gradient PCR was used to amplify the upstream and downstream fragments (Supplementary Fig. 2B). Typically, we use four wells on the gradient, set at 70.8, 68.7, 65.6 and 61.7 °C (Supplementary Fig. 2B) with a high fidelity polymerase such as Phusion (NEB). Using the guidelines for primer design in Box 3, we estimate that we have historically captured >95% of the target amplicons cloned using this approach on the first attempt (for difficult templates, see troubleshooting in Table 3). Individual PCR fragments (424 and 439 bp for the "Up" and "Down" fragments, respectively, Supplementary Fig. 2B) were cut from the agarose and gel purified. The fragments were then joined using SOE-PCR to produce the  $\Delta pelF$  allele using temperature-gradient PCR (Supplementary Fig. 2B).

### Cloning efficiency and sequencing of the allelic exchange vector (Steps 13-35)

The gel purified SOE-PCR product (837 bp, Supplementary Fig. 2B) was recombined with pDONRPEX18Gm, incubated for 1 h at room temperature with BP Clonase®, and transformed into chemically competent *E. coli* Zymo5α Mix & Go cells using the 5 minute protocol provided by the manufacturer (Zymogen). One fifth of the outgrown, transformed cells were spread on selective agar, which yielded ~50 colonies after overnight incubation at 37 °C. A yield of 50-100 clones (or ~250-500 clones for the entire transformation mixture) is typical of the BP clonase reaction in our hands. Four of these colonies we examined by colony PCR, and all of them contained an insert (Supplementary Fig. 2C). The expected size of the PCR product from the pDONRPEX18 vectors is equal to the size of the SOE-PCR product plus 416 bp (1253 bp in this example), which accounts for the distance between M13F and M13R priming sites and the cloned insert. Based on a sample of 50 allelic exchange vectors we have built using Gateway® technology, on the average ~80% of the screened colonies contained an insert. Both of the colonies sent for Sanger sequencing were a perfect match to the predicted sequence. We have found that ~10% of the vectors created using this protocol contain an error that has arisen during the cloning process, which is the impetus for sending two clones for Sanger sequencing at a time.

### Biparental mating and merodiploid selection (Step 36)

The pENTRPEX18Gm:: $\Delta pelF$  vector was introduced into *P. aeruginosa* PAO1 via biparental mating with *E. coli* S17.1. After selection on VBMM agar containing 60  $\mu\text{g ml}^{-1}$  Gm, ~40 colonies were recovered from a 500  $\mu\text{l}$  aliquot of the cells (Step 36A). This was much lower than usual number of merodiploids given the lengths of the regions of homology between the  $\Delta pelF$  allele and the PAO1

chromosome (~776 bp). Based on a sample of 42 biparental matings with pEX18-based allelic exchange vectors, we recovered on average ~450 colonies per mating per 1 kb of homology to the recipient chromosome (Fig. 6A).

### **Counter-selection and mutant detection (Steps 37-49)**

A merodiploid colony was smeared across the surface of NSLB + 15% sucrose agar and incubated for ~36 h. The growth on this plate was scant (usually no more than 200 colonies are recovered during counter-selection). Note that the growth of a bacterial lawn on NSLB + 15% sucrose agar indicates a problem with selection or counter-selection (see troubleshooting in Table 3). Four colonies were picked from the NSLB + 15% sucrose agar plate, transferred onto selective media and screened by PCR. Given the target amplicon of the Seq-F and Seq-R primers, it was expected that the wild type allele would produce a PCR product of 2476 bp, and the deletion allele 1009 bp. We found that two of these colonies had the desired mutation (Supplementary Fig. 2D), as well as antibiotic sensitivity and sucrose resistance (Supplementary Fig. 2E). We did not observe any sucrose resistant merodiploids. The PCR products were sent for sequencing and both 100% matched the predicted deletion sequence.

### **Proof-of-principle**

We used the  $\Delta pelF$  construct, as well as previously described constructs for  $\Delta pslD$ <sup>6</sup> and  $\Delta wspF$ <sup>7</sup>, to show that *P. aeruginosa* PAO1 relies on two extracellular polysaccharides, Pel and Psl, for biofilm development<sup>2</sup>. Production of Pel and Psl is controlled by an intracellular second messenger called cyclic-di-GMP. WspF is a repressor of a diguanylate cyclase, WspR, which synthesizes cyclic-di-GMP<sup>7</sup>. Inactivation of *wspF* artificially increases the intracellular cyclic-di-GMP, causing *P. aeruginosa* PAO1 to overexpress Pel and Psl and overproduce biofilm<sup>8,9</sup>. These biofilms are easily visible in culture tubes and may be stained with crystal violet (Supplementary Fig. 3).

After generating the  $\Delta pelF$  mutant above, we used this protocol to introduce  $\Delta pslD$  into the wild type and  $\Delta pelF$  strains, generating a  $\Delta pslD$  and  $\Delta pelF\Delta pslD$  single and double mutant cell lines, respectively. Next, we used this protocol again to introduce the  $\Delta wspF$  allele into wild type,  $\Delta pelF$ ,  $\Delta pslD$  and  $\Delta pelF\Delta pslD$  backgrounds in parallel. This produced  $\Delta wspF$ ,  $\Delta wspF\Delta pelF$ ,  $\Delta wspF\Delta pslD$  and  $\Delta wspF\Delta pelF\Delta pslD$  strains. Consistent with previous descriptions<sup>9</sup>, loss-of-function mutations in *pelF* or *pslD* decreased the ability of the  $\Delta wspF$  mutant to produce biofilm, whereas the double  $\Delta pelF$  and  $\Delta pslD$  mutations abolished biofilm production in a  $\Delta wspF$  background (Supplementary Fig. 3). Because these mutations could be made in parallel, the construction of the deletion allele as well as the single, double and triple mutants took <5 weeks.

## Supplementary Table 1. Primers.

| Oligonucleotide                                                                              | DNA sequence <sup>a</sup>              |
|----------------------------------------------------------------------------------------------|----------------------------------------|
| <b>Plasmid sequencing (includes sequences deposited in Genbank, see Table 1)<sup>b</sup></b> |                                        |
| JJH367_M13-Universal-F(-21)                                                                  | <u>TGT AAA ACG ACG GCC AGT</u>         |
| JJH368_M13-Universal-R                                                                       | <u>CAG GAA ACA GCT ATG AC</u>          |
| LRH28                                                                                        | <u>GCC CGA GGC ATA GAC TGT ACA AAA</u> |
| LRH30                                                                                        | <u>GGC GGT ACT TGG GTC GAT ATC A</u>   |
| LRH41                                                                                        | <u>CAA AAG GCC AGG AAC CGT AAA A</u>   |
| LRH109                                                                                       | <u>CTC TAG AGG ATC CCC GGG</u>         |
| LRH110                                                                                       | <u>CGA CCG CTG CGC CTT ATC C</u>       |
| LRH111                                                                                       | <u>CAG CGG TCC AGT GAT CGA AG</u>      |
| LRH112                                                                                       | <u>CAG CAA CCG CAC CTG TGG C</u>       |
| LRH113                                                                                       | <u>GCA GAC AAG CCC GTC AGG</u>         |
| LRH114                                                                                       | <u>GAT TCT TCG CCT TGG TAG CC</u>      |
| LRH115                                                                                       | <u>GCT TTT GGT TCG TTT CTT TCG</u>     |
| LRH116                                                                                       | <u>CAT AGT CCA CGA CGC CCG TG</u>      |
| LRH117                                                                                       | <u>TGT AGA AAC GCA AAA AGG CCA TC</u>  |
| LRH118                                                                                       | <u>GTT CAG CTG GAT ATT ACG GCC</u>     |
| LRH119                                                                                       | <u>GAT GTC AAT ATC TCC GGT CTG G</u>   |
| LRH161                                                                                       | <u>CTA CGG GGT CTG ACG CTC</u>         |
| LRH162                                                                                       | <u>GCG ACC TGA GCA ACA ACA TG</u>      |
| LRH163                                                                                       | <u>GAA ACT CAA CGA GCT GGA CG</u>      |
| LRH164                                                                                       | <u>CTT TCG CTT GAG GTA CAG CG</u>      |
| LRH165                                                                                       | <u>GCT GAA CCT GAC CAT TCT TGT G</u>   |
| LRH166                                                                                       | <u>GCA GAC TAC GGG CCT AAA G</u>       |
| LRH167                                                                                       | <u>CGC TAT AAT GAC CCC GAA GC</u>      |
| LRH169                                                                                       | <u>GTG CAC CAT AAT CGG CAT TTT C</u>   |
| LRH170                                                                                       | <u>CGT TCA GCT GGA TAT TAC GGC C</u>   |
| LRH171                                                                                       | <u>GTT GCT CAA GGC ATA TAT GAT G</u>   |
| LRH172                                                                                       | <u>GAT TTA ATA CGG CAT TGA GGA C</u>   |

---

**Sequencing primers for verification of deletion or insertion mutations<sup>c</sup>**

|                           |                                    |
|---------------------------|------------------------------------|
| KMC179_ps1DF1-SEQ         | <u>CCG AGG TCT ACC ATT CCC ACG</u> |
| KMC180_ps1DR1-SEQ         | <u>GAA CTT GGT GCG CTT CCA CAG</u> |
| MEL82_pilBF01-NESTED-SEQ  | <u>GTC GCA GTA GAA GCA GTA G</u>   |
| MEL88_pilCF01-NESTED-SEQ  | <u>CTC TGT TCG CAC TGC AAG</u>     |
| MEL94_pilUF01-NESTED-SEQ  | <u>CCT GAT CAA GAA GAT CGG C</u>   |
| MEL100_pilNF01-NESTED-SEQ | <u>CAG CTC ACC GAG GAG ATC</u>     |
| MEL112_pilSF01-NESTED-SEQ | <u>CTT CGG TCT CTT CGA CTG AT</u>  |
| MEL118_pilRF01-NESTED-SEQ | <u>GAC AGC CAA CTG CAC CTG</u>     |
| MEL124_pilIF01-NESTED-SEQ | <u>GTT GAT GAC TCT CCG ACC</u>     |
| MEL130_pilFF01-NESTED-SEQ | <u>GAG AAG CGC GTG CTG AC</u>      |
| MEL154_fimTF01-NESTED-SEQ | <u>GTA GAA GTC CTG CGA CCA G</u>   |
| JJH764_chpBup-SEQ         | <u>AAA TGG CGG CGA GCG AA</u>      |
| JJH765_chpBdown-SEQ       | <u>CAG CAG GGC GAG GAA TT</u>      |
| JJH770_pilDup-SEQ         | <u>TTA TGC ACG GAC CTT GT</u>      |
| JJH771_pilDdown-SEQ       | <u>GAT GGC ATA GGG CGA TT</u>      |
| JJH776_pilHup-SEQ         | <u>CCA TCC GAA CAT CAT TT</u>      |
| JJH777_pilHdown-SEQ       | <u>TTG CAG TGC CGC TTC TA</u>      |
| JJH782_pilGup-SEQ         | <u>TGT TCC ATG TAG AAC AG</u>      |
| JJH783_pilGdown-SEQ       | <u>ACC GCA TTG ATG GTT TT</u>      |
| JJH788_pilJup-SEQ         | <u>ATG GAC CTC TGC GGT TT</u>      |
| JJH789_pilJdown-SEQ       | <u>GGG GAT GAC GGA AGA AA</u>      |
| JJH794_pilZup-SEQ         | <u>TGA AGA AGC TGC TCA AG</u>      |
| JJH795_pilZdown-SEQ       | <u>TTC GTA GTG GTA GTC GA</u>      |
| JJH800_pilY2up-SEQ        | <u>GCT GCT GCA AAC CAT CA</u>      |
| JJH801_pilY2down-SEQ      | <u>GAG GGG CTC TTT CGT TT</u>      |
| JJH806_pilTup-SEQ         | <u>CTC CTG CAG GTA GTT TT</u>      |
| JJH807_pilTdown-SEQ       | <u>ATG GTT CTC GGC GAA AT</u>      |
| JJH812_fimUup-SEQ         | <u>CGC TTG CAA AGA AGG AAA</u>     |
| JJH813_fimUdown-SEQ       | <u>GTT CGT TCT TCA CCT GTT</u>     |

---

---

|                          |                                        |
|--------------------------|----------------------------------------|
| JJH818_pilVup-SEQ        | <u>GAG GAA CTC AAT GCG AT</u>          |
| JJH819_pilVdown-SEQ      | <u>GAT AGC GGT AGC AGA AT</u>          |
| JJH1183_wspFforward2-SEQ | <u>CTG CGC TCG GAG CAT TTC G</u>       |
| JJH1184_wspFreverse2-SEQ | <u>CAG TGA GCG ACG CAC AGC</u>         |
| JJH1481_pelFF01-SEQ      | <u>CTA CTC GAT GCT CGA CCA GAA G</u>   |
| JJH1482_pelFR01-SEQ      | <u>GAT GCG TTT GTA GGC CTT CAT TC</u>  |
| rjs_pilA_F-SEQ           | <u>CCA AAT CGA GGA AAT CCA GCT GTC</u> |
| rjs_pilA_R-SEQ           | <u>GAA GCG GGG CTT TTT TAT GCG</u>     |

**Construction of allelic exchange vectors with in-frame deletion alleles**

|                         |                                                                                  |
|-------------------------|----------------------------------------------------------------------------------|
| MEL78_pilBupF01-GWB1    | GGG <b>GAC AAG TTT GTA CAA AAA AGC AGG CTA</b> <u>CCT TGT TGG CAT CCG GCT CG</u> |
| MEL79_pilBupR01         | <u>TTA ATC CTT GGT CAC GCG GTT GAC</u> <u>GGA CAG GCC GCT CAG TTG</u>            |
| MEL80_pilBdownF01       | <u>GTC AAC CGC GTG ACC AAG</u>                                                   |
| MEL81_pilBdownR01-GWB2  | GGG <b>GAC CAC TTT GTA CAA GAA AGC TGG GTA</b> <u>GGT CGC GAC TCT ATC CAG C</u>  |
| MEL84_pilCupF01-GWB1    | GGG <b>GAC AAG TTT GTA CAA AAA AGC AGG CTA</b> <u>CGT TCA ACC TGG CGA CCT C</u>  |
| MEL85_pilCupR01         | <u>TTA TCC GAC GAC GTT GCC GAG TTG</u> <u>CAG ATG GGC CTT CAC CAG</u>            |
| MEL86_pilCdownF01       | <u>CAA CTC GGC AAC GTC GTC</u>                                                   |
| MEL87_pilCdownR01-GWB2  | GGG <b>GAC CAC TTT GTA CAA GAA AGC TGG GTA</b> <u>GCA GTT GGT GAT CGG CAT C</u>  |
| MEL90_pilUupF01-GWB1    | GGG <b>GAC AAG TTT GTA CAA AAA AGC AGG CTA</b> <u>CCA TGG TTC GCT CGA TGC TC</u> |
| MEL91_pilUupR01         | <u>GGC AGG GTC GTC GTC GGT GAT TTC</u> <u>CAG GCG CAG CAG CTT TTC</u>            |
| MEL92_pilUdownF01       | <u>GAA ATC ACC GAC GAC GAC C</u>                                                 |
| MEL93_pilUdownR01-GWB2  | GGG <b>GAC CAC TTT GTA CAA GAA AGC TGG GTA</b> <u>CAG GGC AAC AGC CTG AAC</u>    |
| MEL96_pilNupF01-GWB1    | GGG <b>GAC AAG TTT GTA CAA AAA AGC AGG CTA</b> <u>CCG ACA CCG ACC AGT TGA C</u>  |
| MEL97_pilNupR01         | <u>TCA TTT CTT GGC TCC TTG CGC AAC</u> <u>GAT CCG TGC CAT CAG TCG</u>            |
| MEL98_pilNdownF01       | <u>GTT GCG CAA GGA GCC AAG</u>                                                   |
| MEL99_pilNdownR01-GWB2  | GGG <b>GAC CAC TTT GTA CAA GAA AGC TGG GTA</b> <u>GTC GCC AAG TCG TGG TAG</u>    |
| MEL108_pilSupF01-GWB1   | GGG <b>GAC AAG TTT GTA CAA AAA AGC AGG CTA</b> <u>CGA TCA CAG CGC CGA CGA C</u>  |
| MEL109_pilSupR01        | <u>TCA GCT GAG TTT GCG TGG GTG GGC</u> <u>GCT CAG CCG TAG CCG TTC</u>            |
| MEL110_pilSdownF01      | <u>GCC CAC CCA CGC AAA CTC</u>                                                   |
| MEL111_pilSdownR01-GWB2 | GGG <b>GAC CAC TTT GTA CAA GAA AGC TGG GTA</b> <u>CAG CTT GCC GAT CTG GTT G</u>  |
| MEL114_pilRupF01-GWB1   | GGG <b>GAC AAG TTT GTA CAA AAA AGC AGG CTA</b> <u>CCA GCA GCT CGA CCT GAA G</u>  |

---

---

|                          |                                                                                     |
|--------------------------|-------------------------------------------------------------------------------------|
| MEL115_pilRupR01         | <u>GTA GCG CAT CGA GCG GAA CGT CAG GAC GAT CAG GGC TTT TTG TCG</u>                  |
| MEL116_pilRdownF01       | <u>CTG ACG TTC CGC TCG ATG</u>                                                      |
| MEL118_pilRdownR01-GWB2  | GGG <b>GAC CAC TTT GTA CAA GAA AGC TGG GTA</b> <u>CTG GAA CTG CCC GTG GTA C</u>     |
| MEL120_pilIupF01-GWB1    | GGG <b>GAC AAG TTT GTA CAA AAA AGC AGG CTA</b> <u>CGA CGC CGT TTC CTG ATA TCC</u>   |
| MEL121_pilIupR01         | TAC GGC GAC GTC GAG GAA GCC CTG <u>GAA GGG GGT CTG AAC GTC</u>                      |
| MEL122_pilIdownF01       | <u>CAG GGC TTC CTC GAC GTC</u>                                                      |
| MEL123_pilIdownR01-GWB2  | GGG <b>GAC CAC TTT GTA CAA GAA AGC TGG GTA</b> <u>CTG TTC GCT GGC GAG GAT G</u>     |
| MEL126_pilFupF01-GWB1    | GGG <b>GAC AAG TTT GTA CAA AAA AGC AGG CTA</b> <u>CCG CAC CGA ACG ACG AGT TG</u>    |
| MEL127_pilFupR01         | TTC CTG ATA TTC GAG AGA GCC TGG <u>CAG CCC AAC TGC CAA CAG</u>                      |
| MEL128_pilFdownF01       | <u>CCA GGC TCT CTC GAA TAT C</u>                                                    |
| MEL129_pilFdownR01-GWB2  | GGG <b>GAC CAC TTT GTA CAA GAA AGC TGG GTA</b> <u>GTA TGG ATC TCG GTG GTG C</u>     |
| MEL150_fimTupF01-GWB1    | GGG <b>GAC AAG TTT GTA CAA AAA AGC AGG CTA</b> <u>CCT CCT CGA TCG GCA CTT CC</u>    |
| MEL151_fimTupR01         | TCC GGA AGT GCT GCA TAG CTC ACG <u>CGC TCT CTG CGA CCT TTC</u>                      |
| MEL152_fimTdownF01       | <u>CGT GAG CTA TGC AGC ACT TC</u>                                                   |
| MEL153_fimTdownR01-GWB2  | GGG <b>GAC CAC TTT GTA CAA GAA AGC TGG GTA</b> <u>GCC GTG AAG GTC AGA TGT TC</u>    |
| JJH736_pilY1upF01-GWB1   | GGG <b>GAC AAG TTT GTA CAA AAA AGC AGG CTC</b> <u>AGT ACT GGA AAG CCG CAT CAC</u>   |
| JJH737_pilY1upR01        | TCA GTT CTT TCC TTC GAT GGG GCG <u>GAT CTG GTG GAG TAC CGA TTT</u>                  |
| JJH738_pilY1downF01      | <u>CGC CCC ATC GAA GGA AAG A</u>                                                    |
| JJH739_pilY1downR01-GWB2 | GGG <b>GAC CAC TTT GTA CAA GAA AGC TGG GTA</b> <u>GAT CAC GTA GTT CTG GTA ACT G</u> |
| JJH740_pilQupF01-GWB1    | GGG <b>GAC AAG TTT GTA CAA AAA AGC AGG CTC</b> <u>ACA GTC CTA CAT GGA CGA GG</u>    |
| JJH741_pilQupR01         | TCA GCG ACC GAT TGC GAT GGC CTG <u>GCG CGA GAG GCC ACT GTT</u>                      |
| JJH742_pilQdownF01       | <u>CAG GCC ATC GCA ATC GGT C</u>                                                    |
| JJH743_pilQdownR01-GWB2  | GGG <b>GAC CAC TTT GTA CAA GAA AGC TGG GTA</b> <u>CGG TCT CCA CCA CCA CAT C</u>     |
| JJH951_pilWupF02-GWB1    | GGG <b>GAC AAG TTT GTA CAA AAA AGC AGG CTC</b> <u>ACA TGC TCG GCA GCA ACC TG</u>    |
| JJH745_pilWupR01         | TGG CAC GAG ATT CCT GAG TGT CTG <u>GGA GCG GTT GTT CAT GCT C</u>                    |
| JJH746_pilWdownF01       | <u>CAG ACA CTC AGG AAT CTC GTG</u>                                                  |
| JJH952_pilWdownR02-GWB2  | GGG <b>GAC CAC TTT GTA CAA GAA AGC TGG GTA</b> <u>GGT CGC GCT GCT GAT GTC</u>       |
| JJH748_pilMupF01-GWB1    | GGG <b>GAC AAG TTT GTA CAA AAA AGC AGG CTC</b> <u>ACA CAT CGA CGC CAT AAT GGT T</u> |
| JJH749_pilMupR01         | TCA GTC GAA ACT CCT CAA CGC CAG <u>CGC TTT CTT CTT TAT GAG CCC</u>                  |
| JJH750_pilMdownF01       | <u>CTG GCG TTG AGG AGT TTC G</u>                                                    |

---

---

JJH751\_pilMdownR01-GWB2 GGG **GAC CAC TTT GTA CAA GAA AGC TGG GTA** CTT GAC CTC GTT CAG GGT C

JJH766\_pilDupF01-GWB1 GGG **GAC AAG TTT GTA CAA AAA AGC AGG CTC** AGT CGA TGC GCT CGA CTC

JJH767\_pilDupR01 TCA TTT GAA TCC GGC GAA TTG CAG CAG GTA GTC GAG GAG GG

JJH768\_pilDdownF01 CTG CAA TTC GCC GGA TTC AAA

JJH769\_pilDdownR01-GWB2 GGG **GAC CAC TTT GTA CAA GAA AGC TGG GTA** GGT ACT GGA CGA TCT CCG

JJH772\_pilHupF01-GWB1 GGG **GAC AAG TTT GTA CAA AAA AGC AGG CTC** ATC GTC GAC ATC ATG ATG CC

JJH773\_pilHupR01 TCA GCC CGC CAG CAC CGC ATT GAT ATC AAC AAT CAA AAT ACG AGC CAT

JJH774\_pilHdownF01 ATC AAT GCG GTG CTG GCG

JJH775\_pilHdownR01-GWB2 GGG **GAC CAC TTT GTA CAA GAA AGC TGG GTA** GCA GAG GTC CAT GAT CCG

JJH778\_pilGupF01-GWB1 GGG **GAC AAG TTT GTA CAA AAA AGC AGG CTC** AGC GAG CTG TCC TTC TTG AA

JJH779\_pilGupR01 TCA GGA AAC GGC GTC CAC CGG GGT CAA ACC GTC GGA TTG CTG TT

JJH780\_pilGdownF01 ACC CCG GTG GAC GCC

JJH781\_pilGdownR01-GWB2 GGG **GAC CAC TTT GTA CAA GAA AGC TGG GTA** CTT GGT GGT GAC GAT GAT CA

JJH784\_pilJupF01-GWB1 GGG **GAC AAG TTT GTA CAA AAA AGC AGG CTC** AGC TGG TGG TGG AGC ACC

JJH785\_pilJupR01 TCA GGC CTG CTC CAC GCC CTC CGG ATT GCC TGC GTT GAT TTT CTT C

JJH786\_pilJdownF01 CCG GAG GGC GTG GAG

JJH787\_pilJdownR01-GWB2 GGG **GAC CAC TTT GTA CAA GAA AGC TGG GTA** GCA GGG TCG CCC ACT C

JJH790\_pilZupF01-GWB1 GGG **GAC AAG TTT GTA CAA AAA AGC AGG CTC** ACA GCG TGC CGT TGC CAT T

JJH791\_pilZupR TTA CAT CGT GTG GGT CGG CCG GTC CCC CAG ATT GGG TGG CAA

JJH792\_pilZdownF01 GAC CGG CCG ACC CAC

JJH793\_pilZdownR01-GWB2 GGG **GAC CAC TTT GTA CAA GAA AGC TGG GTA** GTC CGG ATC GGC GAG AC

JJH797\_pilY2upF01-GWB1 GGG **GAC AAG TTT GTA CAA AAA AGC AGG CTC** AGA ACG ATG ACC CCT GTG C

JJH798\_pilY2upR TCA TCG GGG CTG CTC CTC CCC GTC CAG CAG CAT AGG CAG CAC

JJH799\_pilY2downF01 GAC GGG GAG GAG CAG C

JJH800\_pilY2downR01-GWB2 GGG **GAC CAC TTT GTA CAA GAA AGC TGG GTA** TTG ATC GGC GTG GCG GT

JJH802\_pilTupF01-GWB1 GGG **GAC AAG TTT GTA CAA AAA AGC AGG CTC** ATC GCC GAA GTC GCG AAG

JJH803\_pilTupR TCA GAA GTT TTC CGG GAT CTT CGC GGC GAG CAG GTC GGT AAT

JJH804\_pilTdownF01 GCG AAG ATC CCG GAA AAC TT

JJH805\_pilTdownR01-GWB2 GGG **GAC CAC TTT GTA CAA GAA AGC TGG GTA** CTT GGT CAC CGG CAT CAC

JJH808\_fimUupF01-GWB1 GGG **GAC AAG TTT GTA CAA AAA AGC AGG CTC** AGG CTC CTC TGG AAC CGT T

---



---

|                          |                                                                                  |
|--------------------------|----------------------------------------------------------------------------------|
| JJH809_fimUupR           | TCA ATA GCA GTA CTG GGG CGC CTT <u>GGT CGA GTT GGA ACG ATA TG</u>                |
| JJH810_fimUdownF01       | <u>AAG GCG CCC CAG TCA TG</u>                                                    |
| JJH811_fimUdownR01-GWB2  | GGG <b>GAC CAC TTT GTA CAA GAA AGC TGG GTA</b> <u>CGG TCC TTG ATC GCG TC</u>     |
| JJH814_pilVupF01-GWB1    | GGG <b>GAC AAG TTT GTA CAA AAA AGC AGG CTC</b> <u>AGA TCA GCA TCC AGG CGC T</u>  |
| JJH938_pilVupR02         | CAT GGC TCG ACC CTG AGG GTG TAC <u>CTG TGT CGC GAT TTC AAT AG</u>                |
| JJH816_pilVdownF01       | <u>TAC ACC CTC AGG GTC GAG</u>                                                   |
| JJH817_pilVdownR01-GWB2  | GGG <b>GAC CAC TTT GTA CAA GAA AGC TGG GTA</b> <u>GTT GAG CCG GCT TTG AAT G</u>  |
| JJH1435_pelFupF01-GWB1   | GGG <b>GAC AAG TTT GTA CAA AAA AGC AGG CTA</b> <u>CGC TGG TAC TGG GAA CTG GC</u> |
| JJH1436_pelFupR01        | GCA ATC TCC GTG GCT TCG CGG TAC <u>AGC GGA GCG GTG TGT TCG GTC</u>               |
| JJH1437_pelFdownF01      | <u>CTG TAC CGC GAA GCC ACG G</u>                                                 |
| JJH1438_pelFdownR01-GWB2 | GGG <b>GAC CAC TTT GTA CAA GAA AGC TGG GTA</b> <u>CAG GGT CGC CAG CAA TAT CG</u> |

#### Construction of allelic exchange vectors with *aacCI*-marked deletion alleles<sup>d</sup>

|                         |                                                                      |
|-------------------------|----------------------------------------------------------------------|
| JJH1636_Gm-F            | <u>CGA ATT AGC TTC AAA AGC GCT CTG A</u>                             |
| JJH1637_Gm-R            | <u>CGA ATT GGG GAT CTT GAA GTT CCT</u>                               |
| JJH1638_GW-attB1        | <u>GGG <b>GAC AAG TTT GTA CAA AAA AGC AGG CT</b></u>                 |
| JJH1639_GW-attB2        | <u>GGG <b>GAC CAC TTT GTA CAA GAA AGC TGG GT</b></u>                 |
| JJH1644_pilCupF01-GWL   | TAC AAA AAA GCA GGC T <u>GT TCA ACC TGG CGA CCT C</u>                |
| JJH1645_pilCupR01-Gm    | TCA GAG CGC TTT TGA AGC TAA TTC G <u>CAG ATG GGC CTT CAC CAG</u>     |
| JJH1646_pilCdownF01-Gm  | AGG AAC TTC AAG ATC CCC AAT TCG <u>CAA CTC GGC AAC GTC GTC</u>       |
| JJH1647_pilCdownR01-GWR | TAC AAG AAA GCT GGG T <u>GCA GTT GGT GAT CGG CAT C</u>               |
| JJH1652_pilNupF01-GWL   | TAC AAA AAA GCA GGC T <u>CG ACA CCG ACC AGT TGA C</u>                |
| JJH1653_pilNupR01-Gm    | TCA GAG CGC TTT TGA AGC TAA TTC G <u>GAT CCG TGC CAT CAG TCG</u>     |
| JJH1654_pilNdownF01-Gm  | AGG AAC TTC AAG ATC CCC AAT TCG <u>GTT GCG CAA GGA GCC AAG</u>       |
| JJH1655_pilNdownR01-GWR | TAC AAG AAA GCT GGG T <u>GTC GCC AAG TCG TGG TAG</u>                 |
| JJH1664_pilRupF01-GWL   | TAC AAA AAA GCA GGC T <u>CA GCA GCT CGA CCT GAA G</u>                |
| JJH1665_pilRupR01-Gm    | TCA GAG CGC TTT TGA AGC TAA TTC G <u>GAC GAT CAG GGC TTT TTG TCG</u> |
| JJH1666_pilRdownF01-Gm  | AGG AAC TTC AAG ATC CCC AAT TCG <u>CTG ACG TTC CGC TCG ATG</u>       |
| JJH1667_pilRdownR01-GWR | TAC AAG AAA GCT GGG T <u>CTG GAA CTG CCC GTG GTA C</u>               |

<sup>a</sup>Regions of homology to the target amplicons are underlined, regions of reverse complementarity are *italicized*, and restriction sites and Gateway *attB1* and *attB2* sequences are in **bold**.

<sup>b</sup>In addition to M13 universal primers, DNA sequences deposited in Genbank (see Table 1) were obtained using the following primers: pEX19Gm (KM887142) – LRH28, LRH30, LRH41, LRH161,

LRH164, LRH165, LRH166, LRH167; pEXG2 (KM887143) – LRH28, LRH30, LRH41, LRH114, LRH115, LRH161, LRH162, LRH163; pDONRPEX18Ap (KM880129) - LRH114, LRH115, LRH116, LRH161, LRH167, LRH169, LRH170, LRH171, LRH172; pDONRPEX18Gm (KM880128) and pEX18GmGW (KM880127) - LRH28, LRH30, LRH41, LRH114, LRH164, LRH165, LRH166, LRH167, LRH169, LRH170, LRH171, LRH172; pDONRPEX18Tc (KM880130) – LRH109, LRH110, LRH111, LRH112, LRH113, LRH114, LRH115, LRH116, LRH117, LRH118, LRH119.

<sup>c</sup>In absence of sequencing primers, mutations were identified and PCR products sequenced using the corresponding “Up-F” and “Down-R” primers used to build the in-frame deletion allele.

<sup>d</sup>Engineered according to the method of Choi and Schweizer<sup>10</sup>.

**Supplementary Table 2. Bacterial strains.**

| Strain                            | Genotype, description or relevant characteristics <sup>a</sup>                                                                                        | Source              |
|-----------------------------------|-------------------------------------------------------------------------------------------------------------------------------------------------------|---------------------|
| <i>Escherichia coli</i>           |                                                                                                                                                       |                     |
| NEB5α                             | fhuA2Δ(argF-lacZ)U169 phoA glnV44 Φ80 Δ(lacZ)M15<br>gyrA96 recA1 relA1 endA1 thi-1 hsdR17                                                             | New England Biolabs |
| ccdB Survival 2 <sup>TM</sup> T1R | Str <sup>r</sup> , F <sup>-</sup> mcrA Δ(mrr-hsdRMS-mcrBC) Φ80lacZΔM15<br>ΔlacX74 recA1 araΔ139 Δ(ara-leu)7697 galU galK rpsL<br>endA1 nupG fhuA::IS2 | Invitrogen          |
| S17.1 λpir                        | Str <sup>r</sup> , Tp <sup>r</sup> , F <sup>-</sup> RP4-2-Tc::Mu aphA::Tn7 recA λpir lysogen                                                          | 11                  |
| SM10 λpir                         | Km <sup>r</sup> , F <sup>-</sup> RP4-2-Tc::Mu recA λpir lysogen                                                                                       | 11                  |
| <i>Pseudomonas aeruginosa</i>     |                                                                                                                                                       |                     |
| JJH0                              | PAO1 wild type strain originating from the laboratory of<br>Dr. Colin Manoil (MPAO1)                                                                  | 12                  |
| PAO1 ΔwspF                        | MPAO1 ΔwspF                                                                                                                                           | 7                   |
| JJH485                            | JJH0 ΔpelF                                                                                                                                            | 13                  |
| JJH492                            | JJH0 ΔpilA                                                                                                                                            | 6                   |
| JJH498                            | JJH0 ΔpslD                                                                                                                                            | 7                   |
| JJH502                            | JJH0 ΔpelF ΔpslD                                                                                                                                      | 14                  |
| JJH524                            | JJH0 ΔpelF ΔpslD ΔwspF                                                                                                                                | This study          |
| JJH628                            | JJH0 ΔchpA                                                                                                                                            | 14                  |
| JJH587                            | JJH0 ΔpilQ                                                                                                                                            | This study          |
| JJH588                            | JJH0 ΔpilD                                                                                                                                            | This study          |
| JJH591                            | JJH0 ΔpilG                                                                                                                                            | This study          |
| JJH592                            | JJH0 ΔpilM                                                                                                                                            | This study          |
| JJH594                            | JJH0 ΔpilJ                                                                                                                                            | This study          |
| JJH595                            | JJH0 ΔpilH                                                                                                                                            | This study          |
| JJH596                            | JJH0 ΔchpB                                                                                                                                            | This study          |
| JJH606                            | JJH0 ΔpilY1                                                                                                                                           | This study          |
| JJH608                            | JJH0 ΔpilY2                                                                                                                                           | This study          |
| JJH610                            | JJH0 ΔpilT                                                                                                                                            | This study          |
| JJH631                            | JJH0 ΔpilV                                                                                                                                            | This study          |
| JJH635                            | JJH0 ΔpilW                                                                                                                                            | This study          |
| JJH645                            | JJH0 ΔpilZ                                                                                                                                            | This study          |
| JJH647                            | JJH0 ΔfimU                                                                                                                                            | This study          |

---

|        |                                                             |            |
|--------|-------------------------------------------------------------|------------|
| JJH739 | JJH0 $\Delta pslD \Delta wspF$                              | This study |
| JJH741 | JJH0 $\Delta pelF \Delta wspF$                              | This study |
| MEL12  | JJH0 $\Delta pilB$                                          | This study |
| JJH873 | JJH0 $\Delta pelF$ (created for the Supplementary Tutorial) | This study |
| JJH899 | JJH0 $\Delta pilC$                                          | This study |
| JJH901 | JJH0 $\Delta pilN$                                          | This study |
| JJH903 | JJH0 $\Delta pilS$                                          | This study |
| JJH904 | JJH0 $\Delta pilR$                                          | This study |
| JJH906 | JJH0 $\Delta fimT$                                          | This study |
| JJH907 | JJH0 $\Delta pilF$                                          | This study |
| JJH909 | JJH0 $\Delta pilI$                                          | This study |
| JJH911 | JJH0 $\Delta pilU$                                          | This study |
| JJH913 | Gm <sup>r</sup> , JJH0 $\Delta pilC::aacCI$                 | This study |
| JJH915 | Gm <sup>r</sup> , JJH0 $\Delta pilN::aacCI$                 | This study |
| JJH917 | Gm <sup>r</sup> , JJH0 $\Delta pilR::aacCI$                 | This study |

---

<sup>a</sup>Gm, gentamicin; Km, kanamycin; Str, streptomycin; Tp, trimethoprim

**Supplementary Table 3. Additional plasmids**

| Plasmid                                                        | Description or relevant characteristics <sup>a</sup>                                                                                                                    | Source     |
|----------------------------------------------------------------|-------------------------------------------------------------------------------------------------------------------------------------------------------------------------|------------|
| <b>Helper plasmids</b>                                         |                                                                                                                                                                         |            |
| pFLP2                                                          | Ap <sup>r</sup> , vector for expressing Flp recombinase                                                                                                                 | 15         |
| <b>Allelic exchange vectors with unmarked deletion alleles</b> |                                                                                                                                                                         |            |
| pCYL1                                                          | Gm <sup>r</sup> , pENTRPEX18Gm with an <i>attL</i> flanked, in-frame deletion allele for <i>P. aeruginosa</i> PAO1 <i>pilB</i>                                          | This study |
| pHA11                                                          | Gm <sup>r</sup> , pENTRPEX18Gm with an <i>attL</i> flanked, in-frame deletion allele for <i>P. aeruginosa</i> PAO1 <i>chpB</i>                                          | This study |
| pHA12                                                          | Gm <sup>r</sup> , pENTRPEX18Gm with an <i>attL</i> flanked, in-frame deletion allele for <i>P. aeruginosa</i> PAO1 <i>pilD</i>                                          | This study |
| pHA13                                                          | Gm <sup>r</sup> , pENTRPEX18Gm with an <i>attL</i> flanked, in-frame deletion allele for <i>P. aeruginosa</i> PAO1 <i>pilH</i>                                          | This study |
| pHA14                                                          | Gm <sup>r</sup> , pENTRPEX18Gm with an <i>attL</i> flanked, in-frame deletion allele for <i>P. aeruginosa</i> PAO1 <i>pilG</i>                                          | This study |
| pHA15                                                          | Gm <sup>r</sup> , pENTRPEX18Gm with an <i>attL</i> flanked, in-frame deletion allele for <i>P. aeruginosa</i> PAO1 <i>pilJ</i>                                          | This study |
| pHL129                                                         | Gm <sup>r</sup> , pEX18Gm with an in-frame deletion allele for <i>P. aeruginosa</i> PAO1 <i>pslD</i>                                                                    | 6          |
| pEX18Gm:: $\Delta pelF$                                        | Gm <sup>r</sup> , pEX18Gm with an in-frame deletion allele for <i>P. aeruginosa</i> PAO1 <i>pelF</i>                                                                    | 13         |
| pEX19Gm:: $\Delta wspF$                                        | Gm <sup>r</sup> , pEX19Gm with an in-frame deletion allele for <i>P. aeruginosa</i> PAO1 <i>wspF</i>                                                                    | 7          |
| pJH130                                                         | Gm <sup>r</sup> , pEX18GmGW with an <i>attB</i> flanked, in-frame deletion allele for <i>P. aeruginosa</i> PAO1 <i>pilA</i>                                             | 6          |
| pJH189                                                         | Gm <sup>r</sup> , pENTRPEX18Gm with an <i>attL</i> flanked, in-frame deletion allele for <i>P. aeruginosa</i> PAO1 <i>pilY1</i>                                         | This study |
| pJH190                                                         | Gm <sup>r</sup> , pENTRPEX18Gm with an <i>attL</i> flanked, in-frame deletion allele for <i>P. aeruginosa</i> PAO1 <i>pilQ</i>                                          | This study |
| pJH192                                                         | Gm <sup>r</sup> , pENTRPEX18Gm with an <i>attL</i> flanked, in-frame deletion allele for <i>P. aeruginosa</i> PAO1 <i>pilM</i>                                          | This study |
| pJH196                                                         | Gm <sup>r</sup> , pENTRPEX18Gm with an <i>attL</i> flanked, in-frame deletion allele for <i>P. aeruginosa</i> PAO1 <i>pilY2</i>                                         | This study |
| pJH197                                                         | Gm <sup>r</sup> , pENTRPEX18Gm with an <i>attL</i> flanked, in-frame deletion allele for <i>P. aeruginosa</i> PAO1 <i>pilT</i>                                          | This study |
| pJH205                                                         | Gm <sup>r</sup> , pENTRPEX18Gm with an <i>attL</i> flanked, in-frame deletion allele for <i>P. aeruginosa</i> PAO1 <i>pilZ</i>                                          | This study |
| pJH206                                                         | Gm <sup>r</sup> , pENTRPEX18Gm with an <i>attL</i> flanked, in-frame deletion allele for <i>P. aeruginosa</i> PAO1 <i>chpA</i>                                          | 14         |
| pJH207                                                         | Gm <sup>r</sup> , pENTRPEX18Gm with an <i>attL</i> flanked, in-frame deletion allele for <i>P. aeruginosa</i> PAO1 <i>fimU</i>                                          | This study |
| pJH210                                                         | Gm <sup>r</sup> , pENTRPEX18Gm with an <i>attL</i> flanked, in-frame deletion allele for <i>P. aeruginosa</i> PAO1 <i>pilV</i>                                          | This study |
| pJH214                                                         | Gm <sup>r</sup> , pENTRPEX18Gm with an <i>attL</i> flanked, in-frame deletion allele for <i>P. aeruginosa</i> PAO1 <i>pilW</i>                                          | This study |
| pJH302                                                         | Gm <sup>r</sup> , pENTRPEX18Gm with an <i>attL</i> flanked, in-frame deletion allele for <i>P. aeruginosa</i> PAO1 <i>pelF</i> (created for the Supplementary Tutorial) | This study |

|                                                              |                                                                                                                                |            |
|--------------------------------------------------------------|--------------------------------------------------------------------------------------------------------------------------------|------------|
| pJH337                                                       | Gm <sup>r</sup> , pENTRPEX18Gm with an <i>attL</i> flanked, in-frame deletion allele for <i>P. aeruginosa</i> PAO1 <i>pilC</i> | This study |
| pJH338                                                       | Gm <sup>r</sup> , pENTRPEX18Gm with an <i>attL</i> flanked, in-frame deletion allele for <i>P. aeruginosa</i> PAO1 <i>pilN</i> | This study |
| pJH340                                                       | Gm <sup>r</sup> , pENTRPEX18Gm with an <i>attL</i> flanked, in-frame deletion allele for <i>P. aeruginosa</i> PAO1 <i>pilS</i> | This study |
| pJH341                                                       | Gm <sup>r</sup> , pENTRPEX18Gm with an <i>attL</i> flanked, in-frame deletion allele for <i>P. aeruginosa</i> PAO1 <i>pilR</i> | This study |
| pJH342                                                       | Gm <sup>r</sup> , pENTRPEX18Gm with an <i>attL</i> flanked, in-frame deletion allele for <i>P. aeruginosa</i> PAO1 <i>fimT</i> | This study |
| pJH343                                                       | Gm <sup>r</sup> , pENTRPEX18Gm with an <i>attL</i> flanked, in-frame deletion allele for <i>P. aeruginosa</i> PAO1 <i>pilF</i> | This study |
| pJH344                                                       | Gm <sup>r</sup> , pENTRPEX18Gm with an <i>attL</i> flanked, in-frame deletion allele for <i>P. aeruginosa</i> PAO1 <i>pilI</i> | This study |
| pJH345                                                       | Gm <sup>r</sup> , pENTRPEX18Gm with an <i>attL</i> flanked, in-frame deletion allele for <i>P. aeruginosa</i> PAO1 <i>pilU</i> | This study |
| <b>Allelic exchange vectors with marked deletion alleles</b> |                                                                                                                                |            |
| pJH331                                                       | Gm <sup>r</sup> , pENTRPEX18Ap: $\Delta pilC::aacCI$                                                                           | This study |
| pJH334                                                       | Gm <sup>r</sup> , pENTRPEX18Ap: $\Delta pilR::aacCI$                                                                           | This study |
| pJH336                                                       | Gm <sup>r</sup> , pENTRPEX18Ap: $\Delta pilN::aacCI$                                                                           | This study |

<sup>a</sup>Ap, ampicillin; Cm, chloramphenicol; Kn, kanamycin; Gm, Gentamicin; Tet, tetracycline

## Supplementary References

- 1 Ghafoor, A., Jordens, Z. & Rehm, B. H. Role of PelF in pel polysaccharide biosynthesis in *Pseudomonas aeruginosa*. *Appl. Environ. Microbiol.* **79**, 2968-2978, (2013).
- 2 Colvin, K. M. *et al.* The Pel and Psl polysaccharides provide *Pseudomonas aeruginosa* structural redundancy within the biofilm matrix. *Environ. Microbiol.* **14**, 1913-1928, (2012).
- 3 Winsor, G. L. *et al.* *Pseudomonas* Genome Database: improved comparative analysis and population genomics capability for *Pseudomonas* genomes. *Nucleic Acids Res.* **39**, D596-600, (2011).
- 4 Kibbe, W. A. OligoCalc: an online oligonucleotide properties calculator. *Nucleic Acids Res.* **35**, W43-46, (2007).
- 5 Untergasser, A. *et al.* Primer3--new capabilities and interfaces. *Nucleic Acids Res.* **40**, e115, (2012).
- 6 Zhao, K. *et al.* Psl trails guide exploration and microcolony formation in *Pseudomonas aeruginosa* biofilms. *Nature* **497**, 388-391, (2013).
- 7 Hickman, J. W., Tifrea, D. F. & Harwood, C. S. A chemosensory system that regulates biofilm formation through modulation of cyclic diguanylate levels. *Proc. Natl. Acad. Sci. U. S. A.* **102**, 14422-14427, (2005).
- 8 Baraquet, C., Murakami, K., Parsek, M. R. & Harwood, C. S. The FleQ protein from *Pseudomonas aeruginosa* functions as both a repressor and an activator to control gene expression from the pel operon promoter in response to c-di-GMP. *Nucleic Acids Res.* **40**, 7207-7218, (2012).
- 9 Starkey, M. *et al.* *Pseudomonas aeruginosa* rugose small colony variants have adaptations that likely promote persistence in the cystic fibrosis lung. *J. Bacteriol.* **191**, 3492-3503, (2009).
- 10 Choi, K. H. & Schweizer, H. P. An improved method for rapid generation of unmarked *Pseudomonas aeruginosa* deletion mutants. *BMC Microbiol.* **5**, 30, (2005).
- 11 Simon, R., Priefer, U. & Pühler, A. A broad host range mobilization system for *in vivo* genetic engineering: transposon mutagenesis in gram negative bacteria. *Nat. Biotechnol.* **1**, 784-791, (1983).
- 12 Jacobs, M. A. *et al.* Comprehensive transposon mutant library of *Pseudomonas aeruginosa*. *Proc. Natl. Acad. Sci. U. S. A.* **100**, 14339-14344, (2003).
- 13 Tseng, B. S. *et al.* The extracellular matrix protects *Pseudomonas aeruginosa* biofilms by limiting the penetration of tobramycin. *Environ. Microbiol.* **15**, 2865-2878, (2013).
- 14 Almlad, H. *et al.* The cyclic AMP-Vfr signaling pathway in *Pseudomonas aeruginosa* is inhibited by cyclic di-GMP. *J. Bacteriol.* **197**, 2190-2200, (2015).
- 15 Hoang, T. T., Karkhoff-Schweizer, R. R., Kutchma, A. J. & Schweizer, H. P. A broad-host-range Flp-FRT recombination system for site-specific excision of chromosomally-located DNA sequences: application for isolation of unmarked *Pseudomonas aeruginosa* mutants. *Gene* **212**, 77-86, (1998).
